# Supplementary material
Source: PubMed Central journal article supplement (PMC3049858)

### CRP and Risk of Colorectal Cancer

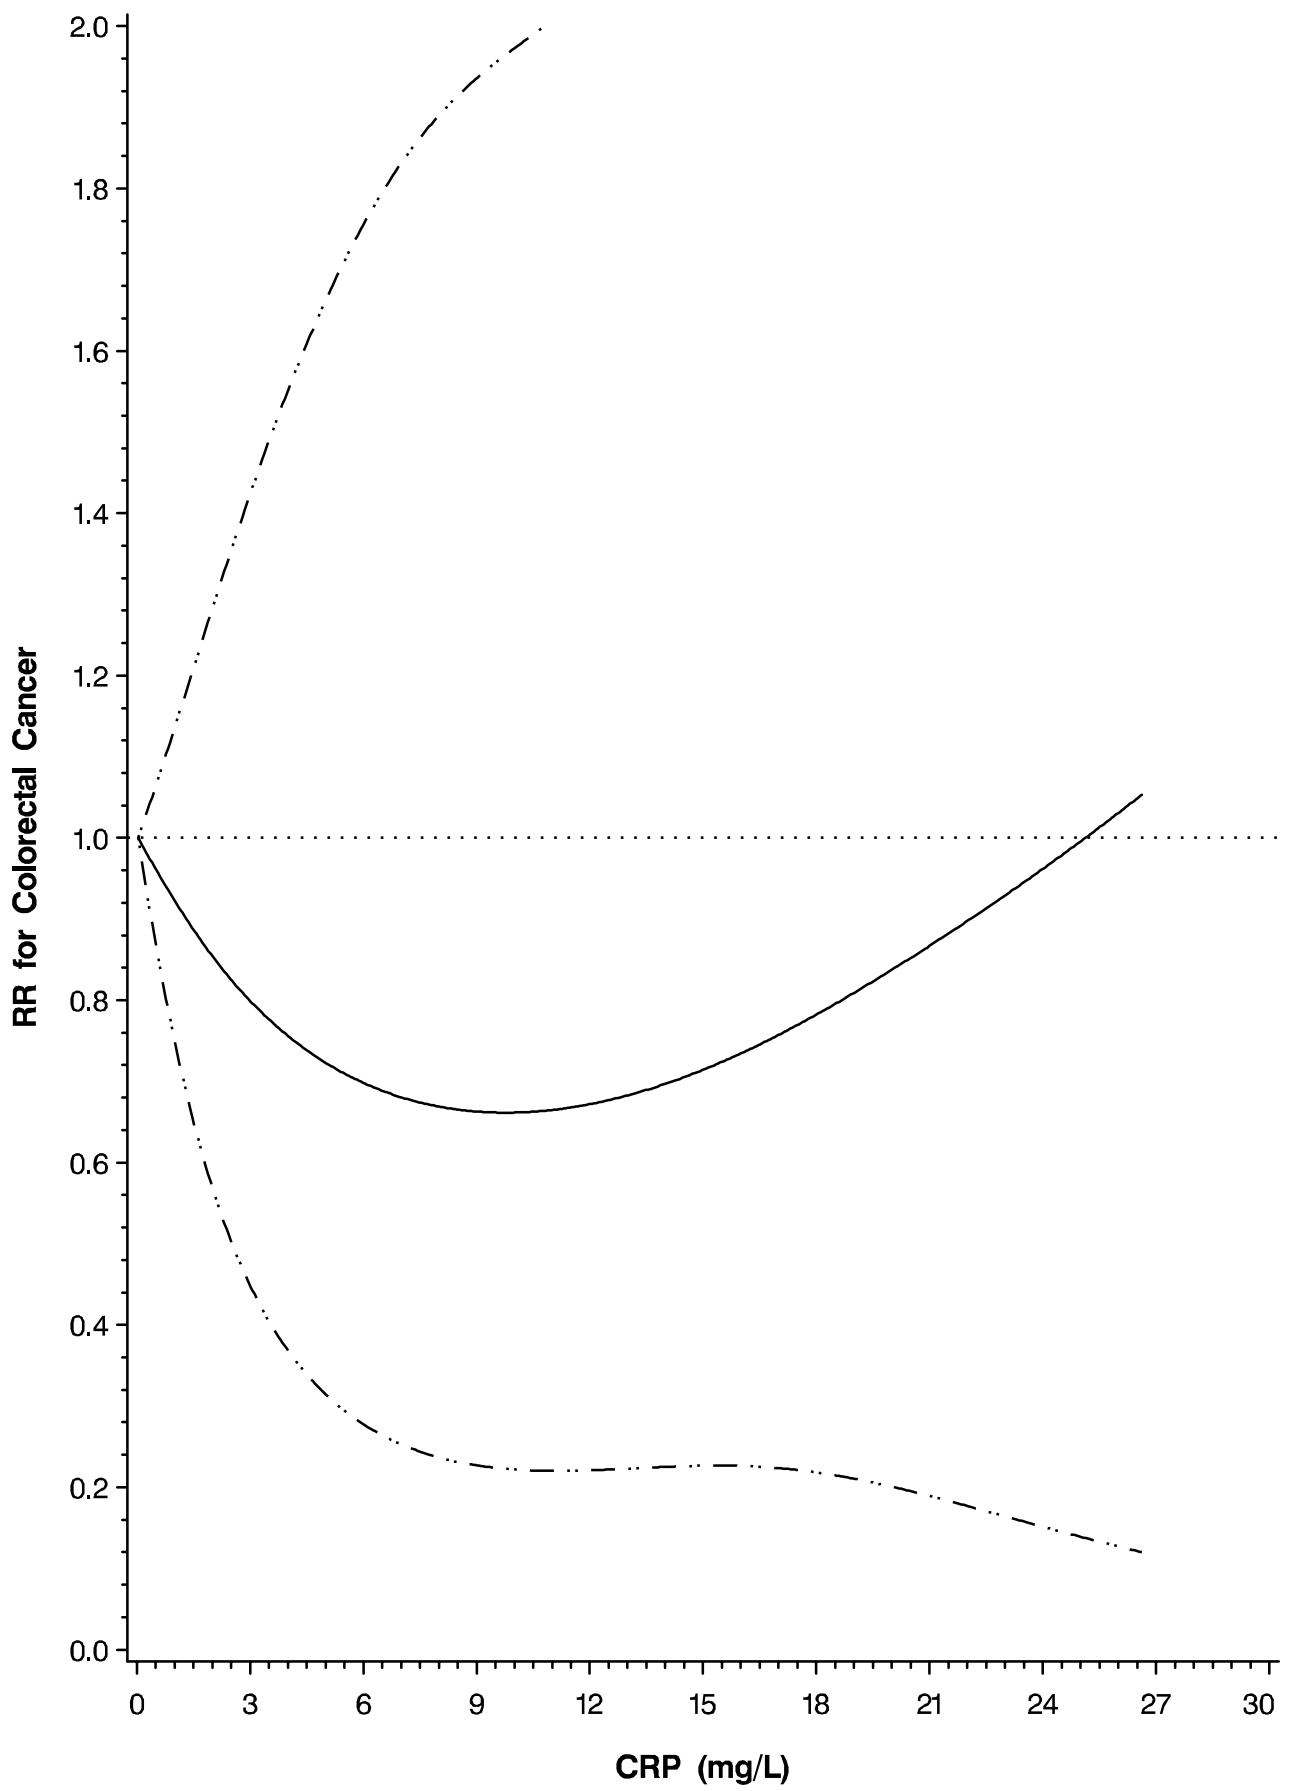

Supplement: NIHMS257225-supplement-02.pdf [file NIHMS257225-supplement-02.pdf]

### CRP and Risk of Colorectal Cancer

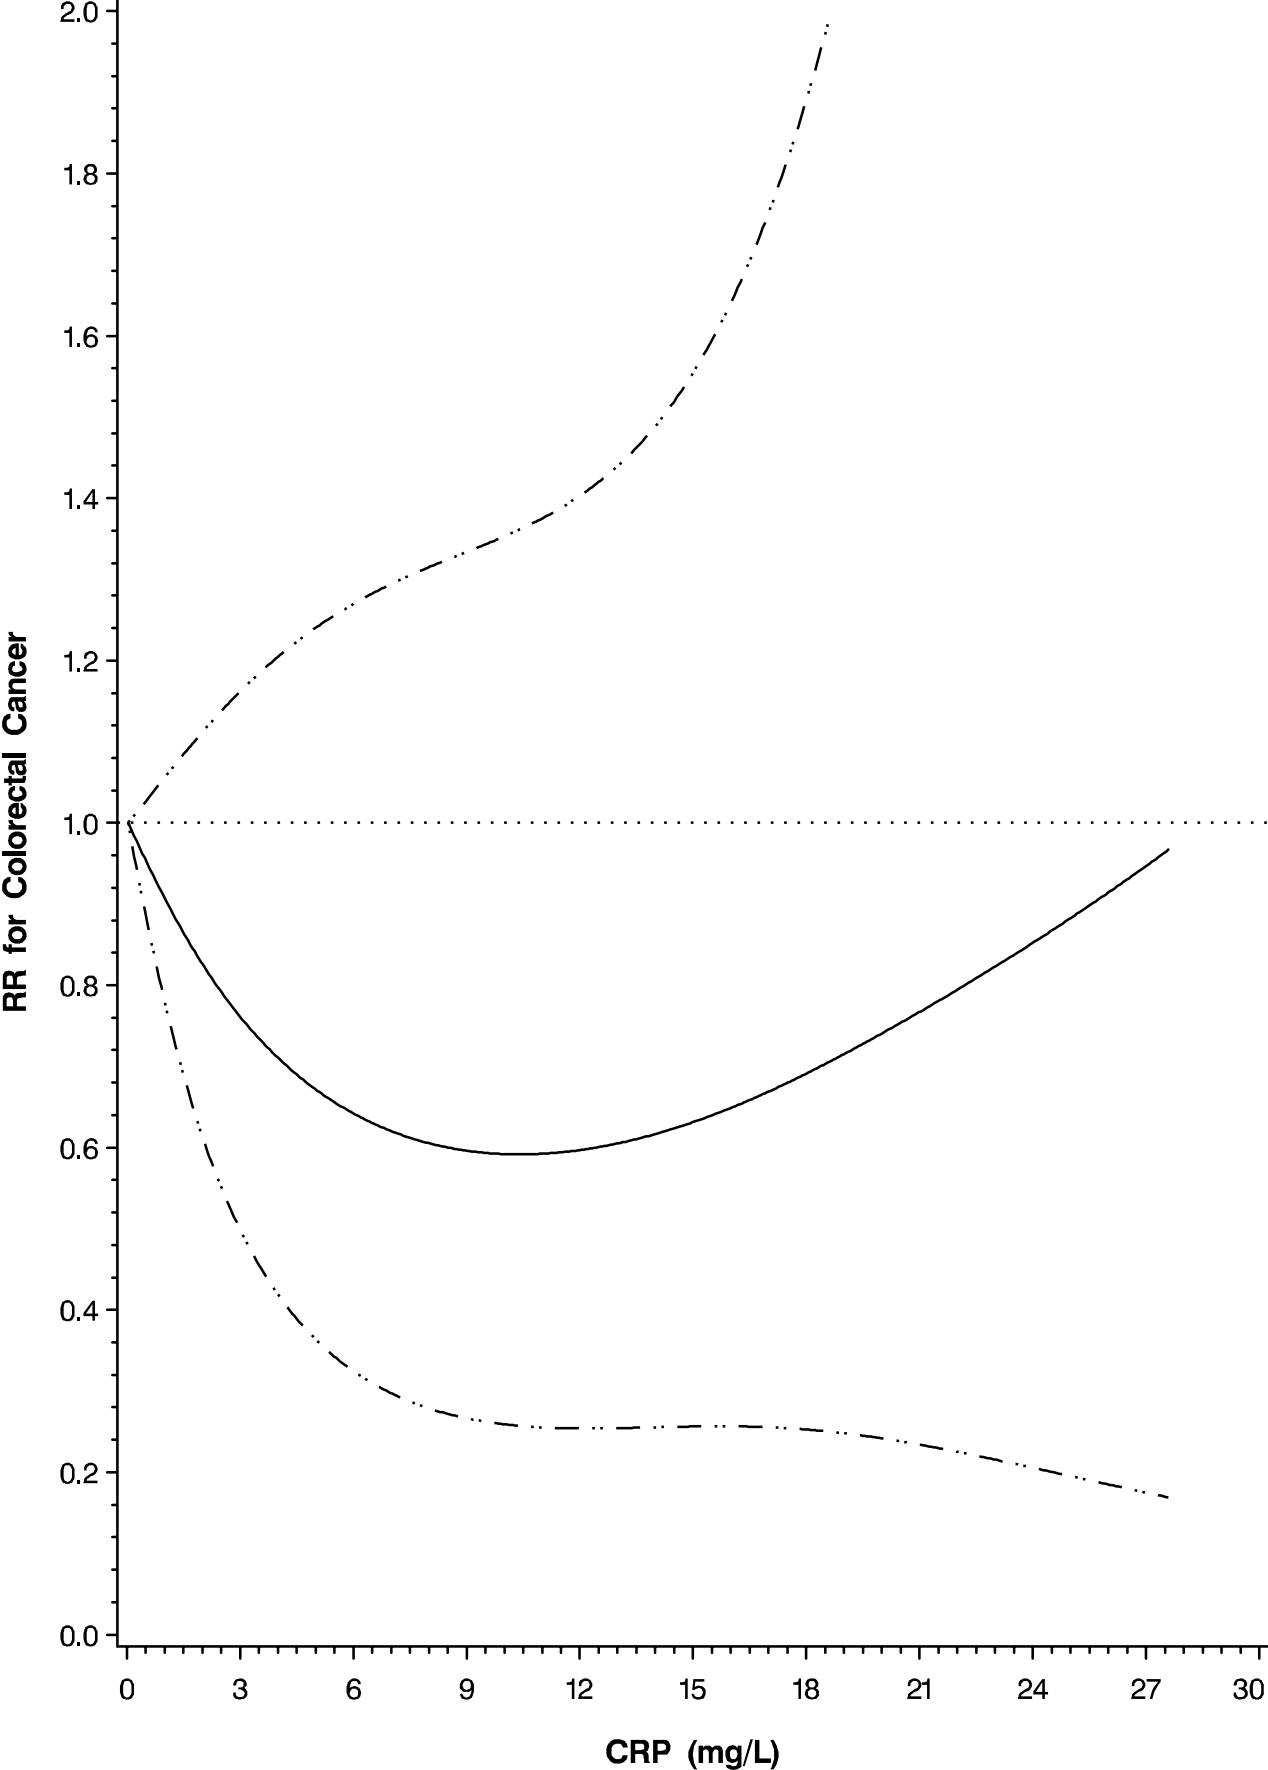

Supplement: NIHMS257225-supplement-03.pdf [file NIHMS257225-supplement-03.pdf]

### CRP and Risk of Colorectal Cancer

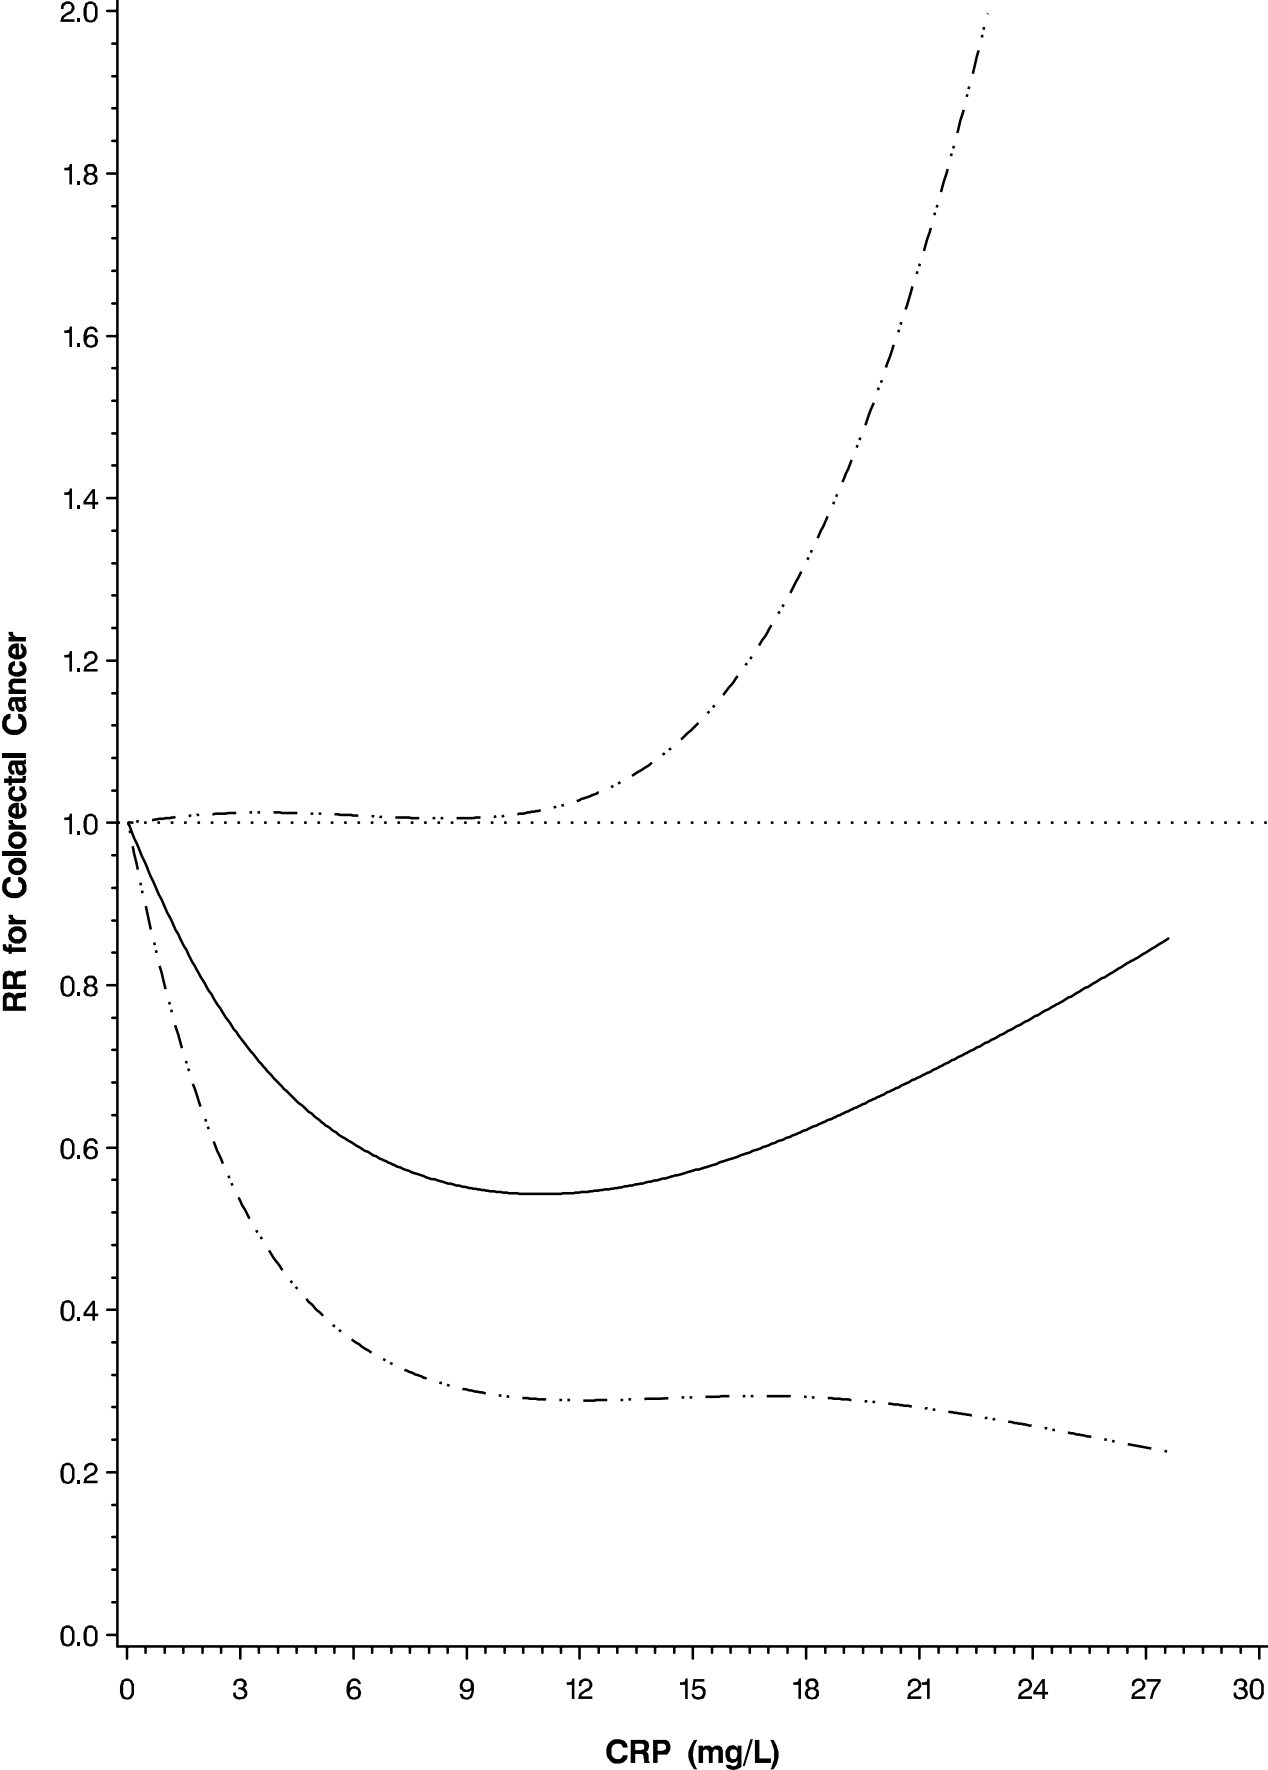

Supplement: NIHMS257225-supplement-04.pdf [file NIHMS257225-supplement-04.pdf]
